# Supplementary material for: Generation of mitochondrial reactive oxygen species is controlled by ATPase inhibitory factor 1 and regulates cognition
Source: PLoS Biol. 2021 May 13;19(5):e3001252. doi: 10.1371/journal.pbio.3001252 (PMC8148373; doi:10.1371/journal.pbio.3001252)
Supplement: S1 Data — Excel spreadsheet containing, in separate sheets, the underlying numerical data for Fig 1E–1J; Fig 2A–2J; Fig 3B and 3H; Fig 4C and 4D; Fig 5B and 5C; Fig 6C–6F, 6H, 6J and 6K; Fig 7A–7E; S1A–S1C Fig; S2A–S2C, S2E and S2F Fig; S3A–S3E and S3G Fig; S4B–S4F Fig. (XLSX) [file pbio.3001252.s005.xlsx]

## Sheet: Figure 1
Figure 1E
ATP synthesis (nmol min-1 mg prot-1)	KO	CRL	TG	OL
EXP 1	26.5823	17.5996	9.407	0
EXP 2	33.1571	15.7492	17.2269	-3.4831
EXP 3	52.3898	22.2833	11.5264	1.7795
EXP 4	35.1448	26.5689	12.3733	5.4742
EXP 5		28.658	12.9039
Figure 1F
ATPase activity (mU mg prot-1)	KO	CRL	TG	OL
EXP 1	208	141	117	4
EXP 2	218	181	99	16
EXP 3	224	121	110	1
EXP 4		143		14
Figure 1G
% Immunoprecipitated (β-F1)	KO	CRL	TG		% Immunoprecipitated (IF1)	KO	CRL	TG
EXP 1	87.408	70.875	77.336		EXP 1	0	61.422	82.446
EXP 2	82.358	78.552	90.37		EXP 2	0	62.133	80.145
EXP 3	43.033	64.409	100		EXP 3	16.227	31.181	73.912
Figure 1H
Aspect ratio	KO	CRL	TG		Area (μm2)	KO	CRL	TG		Cristae contacting IMM (μm-2)	KO	CRL	TG
	1.383	1.456	1.707			0.429	0.319	0.192			21.077	36.054	53.763
	1.705	1.097	1.798			0.65	0.231	0.313			11.198	41.566	23.073
	1.431	1.226	2.132			0.365	0.146	0.114			25.997	45.016	23.675
	1.33	1.526	3.115			0.36	0.321	0.495			19.034	45.035	27.599
	1.087	1.177	1.425			0.437	0.116	0.332			16.783	48.701	42.918
	1.477	1.564	1.369			0.619	0.331	0.191			30.146	30.538	41.551
	1.903	1.698	1.49			0.456	0.125	0.377			17.525	36.439	31.839
	1.042	2.24	1.738			0.209	0.253	0.48			28.329	24.231	43.809
	1.543	2.553	1.472			0.249	0.787	0.314			21.014	25.23	39.683
	2.067	1.685	1.456			0.498	0.097	0.191			19.334	15.508	45.83
	1.342	1.836	1.601			0.133	0.458	0.354			10.993	41.22	35.854
	1.047	1.445	1.166			0.497	0.353	0.233			14.2	27.431	48.588
	1.405	2.11	1.059			0.187	0.262	0.315			23.552	30.882	35.242
	1.239	1.625	1.298			0.276	0.309	0.325			18.425	30.81	28.969
	1.719	1.316	1.48			0.385	0.134	0.255			18.371	34.843	35.958
	1.083	1.508	1.523			0.545	0.102	0.204			24.053	23.52	40.099
	1.108	2.542	1.324			0.311	0.555	0.192			17.123	35.259	39.707
	1.121	2.091	1.359			0.075	0.205	0.389			28.599	21.716	49.298
	1.057	1.359	1.197			0.229	0.175	0.118			26.572		49.173
	1.384	1.746	1.545			0.29	0.156	0.207					69.672
	1.065	1.92	1.12			0.137	0.255	0.315					44.065
	1.258	1.542	1.088			0.173	0.444	0.149					55.388
	1.759	1.11	1.187			0.338	0.107	0.246
	1.025	1.432	1.348			0.331	0.428	0.217
	1.333	1.13	2.013			0.23	0.471	0.123
	1.146	1.381	1.766			0.25	0.427	0.148
	1.102	1.359	1.695			0.258	0.208	0.162
	1.039	1.322	2.734			0.193	0.589	0.352
	1.442	1.305	2.201			0.23	0.289	0.468
	1.174	1.205	1.309			0.108	0.395	0.249
	1.12	1.256	2.385			0.193	0.31	0.421
	1.815	2.304	2.091			0.409	0.265	0.226
	1.206	1.362	1.11			0.175	0.526	0.136
	1.629	1.524	2.002			0.178	0.219	0.27
	1.504	2.005	2.173			0.227	0.273	0.472
	1.115	1.938	1.206			0.118	0.123	0.11
	1.497	2.309	2.103			0.152	0.163	0.363
	1.361	1.669	1.329			0.423	0.26	0.455
	1.295	1.127	1.332			0.223	0.215	0.458
	1.08	1.363	1.102			0.25	0.14	0.367
	1.091	3.09	1.412			0.214	0.427	0.302
	1.691	1.372	1.085			0.175	0.165	0.149
	1.232	2.651	1.82			0.381	0.282	0.368
	1.27	1.726	1.173			0.27	0.546	0.711
	1.567	2.506	1.223			0.417	0.375	0.119
	1.391	2.29	1.973			0.212	0.197	0.331
		2.479	1.194				0.408	0.369
		2.027	1.686				0.307	0.31
		2.44	1.242				0.336	0.232
		2.033	1.158				0.201	0.461
		2.507	1.363				0.325	0.514
		2.668	2.295				0.347	0.489
		2.623	1.758				0.383	0.348
		1.582	1.188				0.355	0.563
			1.515					0.499
			2.811					0.318
			2.533					0.369
			2.356					0.232
			1.812					0.3
			1.31					0.401
			1.535					0.294
			1.117					0.244
			2.455					0.201
			3.148					0.295
			2.396					0.399
			1.485					0.197
			2.374					0.314
			2.352					0.31
			2.351					0.338
Figure 1I
OPA1	KO	CRL	TG		MFN2	KO	CRL	TG		DRP1	KO	CRL	TG
	1.1589	0.8553	1.2242			1.7891	0.9175	1.3099			1.1595	1.2786	0.559
	0.8294	1.0307	1.2895			1.2628	1.1047	1.1619			0.8059	1.3696	0.7813
	0.7687	1.1552	1.2104			1.0696	0.5067	0.8647			0.9834	0.7092	0.1515
	0.9049	0.9365	0.7534			0.6035	1.2855	0.9206			1.5239	0.9738	0.7268
	0.8089	1.0223	0.7625			1.1323	1.1856	1.2118			0.9021	0.6688	0.4283
VDAC	KO	CRL	TG		IMMT	KO	CRL	TG		HSP60	KO	CRL	TG
	1.4401	0.6737	2.5153			0.4258	0.984	2.8006			1.3985	1.2589	1.5604
	0.9343	1.7422	3.9561			0.8089	1.3063	2.0478			1.2588	0.8783	1.0642
	1.5098	1.1115	4.9494			1.5679	1.3366	2.9706			1.1019	0.5243	1.4985
	1.1304	0.7017	1.9596			0.4788	0.5015	1.5828			0.5391	1.1743	0.5819
	0.8052	0.7709	4.8418			0.8671	0.8717	1.9044			1.2249	1.1642	0.7319
Figure 1J
mtDNA copy number	KO	CRL	TG
	0.973827	1.1528	2.0281
	1.49035	1.00912	0.807729
	0.633188	0.87966	1.6958
	0.940047	0.99489	1.27273
	1.43179	1.10179	1.24799
	1.3818	1.17003	0.935998
	1.63651	0.97665	0.857438
	1.51545	1.06658	1.13359
	1.9956	0.648483	1.25288

## Sheet: Figure 2
Figure 2A
OCR (pmol O2 min-1 μg prot-1)	Time (min):	0.2	5.9	11.383	17.1	22.683	28.4	33.983	39.683	45.267
KO	Embryo 1	51.5755	51.2234	49.3135	20.1089	23.5746	124.829	126.366	8.0024	7.9872
	Embryo 2	134.556	132.236	133.494	60.4359	61.8652	195.554	162.357	34.452	33.4947
	Embryo 3	71.8614	69.0508	70.9325	29.2648	31.4419	83.6415	70.4584	15.3308	15.3042
	Embryo 4	110.007	96.2534	104.629	42.5744	48.3081	180.213	141.533	29.1252	33.4365
	Embryo 5	105.149	106.006	106.666	37.5371	44.4578	139.704	108.208	21.164	20.1229
	Embryo 6	49.8098	47.4308	50.4524	20.0571	21.1262	89.076	71.9393	9.8967	10.1148
CRL	Embryo 1	41.5899	43.2145	41.8508	21.9357	22.6	120.196	129.139	10.2064	12.5898
	Embryo 2	74.9115	76.1225	76.3156	36.3191	35.407	213.387	234.211	12.4468	13.5347
	Embryo 3	29.9646	29.0897	29.5884	14.3129	13.807	87.5059	93.5995	5.6823	7.9541
	Embryo 4	36.4724	35.7248	35.5897	20.1658	15.8022	75.1088	76.7212	9.4208	9.0679
	Embryo 5	79.1391	79.5987	80.2353	30.9254	40.5277	125.871	94.4133	19.2326	20.444
	Embryo 6	64.3766	61.4539	60.4459	23.0961	26.8033	91.1066	80.1521	15.5028	15.8511
	Embryo 7	41.7204	40.1138	39.2206	12.5588	14.0312	65.8259	51.2806	7.0166	7.879
	Embryo 8	37.9005	37.7622	38.6094	12.0025	12.6554	56.2085	47.3951	6.696	7.3801
	Embryo 9	44.3374	47.7666	47.0173	15.0675	13.7258	65.4345	68.7667	10.879	14.6381
	Embryo 10	41.3172	50.6943	53.2441	17.0959	16.5541	67.4642	68.1895	17.3406	15.5882
TG	Embryo 1	37.5184	36.7235	36.9687	16.7322	14.1822	68.6412	71.207	10.2484	8.5665
	Embryo 2	41.9774	41.6805	42.8191	18.1505	17.7776	80.0979	82.0311	12.421	12.2361
	Embryo 3	28.6513	28.5986	30.1512	13.5662	13.2659	59.3322	62.6231	9.0431	8.1534
	Embryo 4	22.7392	22.2129	22.9301	10.6498	9.4238	55.2309	47.9709	5.3242	5.3327
	Embryo 5	33.8851	33.8226	33.7883	16.4674	14.2662	71.4022	77.5045	10.7033	9.2658
	Embryo 6	27.1277	27.1208	27.595	12.642	10.8509	53.9862	62.0763	6.8486	6.1248
	Embryo 7	25.2081	30.5572	29.91	6.736	6.0033	38.319	32.0074	4.0663	6.8071
	Embryo 8	30.8696	35.5809	34.3273	11.8133	9.1288	46.1943	43.0459	9.2822	8.7222
Figure 2B
OCR (pmol O2 min-1 μg prot-1)		Basal	OSR	Max	H+ leak
KO	Embryo 1	42.7094	28.8624	117.603	13.847
	Embryo 2	99.4553	72.2781	144.982	27.1772
	Embryo 3	55.2974	40.2616	61.7325	15.0359
	Embryo 4	72.3488	58.1884	129.592	14.1604
	Embryo 5	85.2971	64.9431	103.313	20.354
	Embryo 6	39.2253	28.6394	70.5019	10.5859
CRL	Embryo 1	30.8203	19.9506	113.269	10.8698
	Embryo 2	62.7924	39.9202	210.808	22.8723
	Embryo 3	22.7294	15.4876	86.7814	7.24179
	Embryo 4	26.6846	17.9449	67.4769	8.73967
	Embryo 5	59.8194	43.9311	90.3037	15.8883
	Embryo 6	46.4151	37.1425	69.9524	9.27269
	Embryo 7	32.9038	27.0566	58.3781	5.84722
	Embryo 8	31.0527	25.7618	49.1704	5.29091
	Embryo 9	33.6152	31.9772	57.8877	1.63807
	Embryo 10	31.9541	31.5935	52.6014	1.2368
TG	Embryo 1	27.6627	21.613	58.3929	6.04975
	Embryo 2	29.8304	24.1949	67.7694	5.63551
	Embryo 3	20.5354	15.7176	50.289	4.37293
	Embryo 4	17.2989	12.5906	46.2724	4.09529
	Embryo 5	23.8475	18.4652	60.6989	4.66353
	Embryo 6	20.7945	15.5347	47.4995	4.36418
	Embryo 7	23.1217	22.1888	29.7264	0.932957
	Embryo 8	24.5904	23.1216	35.6179	1.46883
Figure 2C
Complex IV activity (mU mg prot-1)		KO	CRL	TG
		534.386	516.74	313.302
		541.49	509.286	399.312
		558.187	542.399	486.519
		622.561	641.532	567.101
		635.506	649.821	545.337
		608.588	630.717	462.596
Figure 2D
Complex I activity (mU mg prot-1)		KO	CRL	TG
		85.137	96.385	95.9517
		101.665	86.1691	88.7755
		121.973	142.506	104.069
		110.888	161.874	127.041
		132.444	131.963	83.2436
		106.503	86.7191	123.618
Figure 2E
Lactate production (μmol h-1 mg prot-1)		KO	CRL	TG
		0.8	0.68	0.48
		0.98	0.67	0.54
		0.81	0.52	0.6
			0.99	0.53
Figure 2F
ECAR (mpH min-1 μg prot-1)		KO	KO +OL	CRL	CRL +OL	TG	TG +OL
		6.6156	11.3605	6.768	11.0251	3.0848	3.9568
		4.346	6.4805	9.8603	16.0155	4.8074	5.9777
		3.6727	5.574	4.2143	9.0936	5.176	6.6717
		10.6628	17.0547	3.6077	3.9268	2.9392	3.4029
		4.704	7.974	5.0841	5.5123	5.6676	6.5209
		14.8238	21.8265	4.9125	8.9103	3.4636	3.8926
		14.807	21.1034	2.0557	3.4029
		3.0392	4.3522	7.68	12.3821
				3.227	5.6036
				8.2076	15.6505
				7.4987	15.0096
Figure 2G
p-AMPKα/AMPKα	KO	CRL	TG		p-AMPKβ/AMPKβ	KO	CRL	TG		p-ACC/ACC	KO	CRL	TG
	0.7424	0.4597	2.1722			1.3118	1.2258	2.4647			2.8489	1.2104	3.4619
	0.6692	0.6	1.7889			0.9359	0.6777	1.9487			1.3887	1.1825	2.817
	2.7107	3.1208	8.9504			0.3461	1.238	1.3299			1.2526	1.4238	2.5094
	0.3142	0.8008	4.7813			0.1691	0.9216	2.5019			0.6146	0.6908	4.2774
	1.2815	0.0187	5.0627			0.6793	0.9369	2.1118			1.1331	0.4924	2.533
PYGM	KO	CRL	TG		GAPDH	KO	CRL	TG		LDHA	KO	CRL	TG
	0.7886	1.198	1.1426			1.6221	1.186	1.5205			0.2096	0.9372	1.173
	0.6739	1.1317	0.8335			1.0171	1.14	2.2125			0.5693	1.4067	0.3458
	1.0771	1.4037	0.6358			1.2494	1.2238	1.2979			0.3573	0.3146	1.2019
	0.3375	0.7471	0.3807			0.8849	0.8781	0.8006			0.7363	1.1453	0.9401
	0.5399	0.5195	1.4305			1.2027	0.572	1.5691			1.3189	1.1962	1.6948
Figure 2H
ATP/ADP ratio	KO	CRL	TG
	0.9237	0.9932	0.6144
	0.8705	0.745	0.4281
	1.1387	1.1818	0.8257
	0.9966	1.1499	1.1385
	1.3971	1.4289	1.5469
	1.1126	0.5011	0.5578
Figure 2I
ΔΨm (TMRM/MTG)	KO	KO +OL	CRL	CRL +OL	TG	TG +OL
	0.81988	0.47715	0.77896	1.40503	1.36129	2.54555
	0.63866	2.00029	1.25226	1.73494	2.05491	2.69945
	0.3128	0.4665	1.6914	2.19391	1.57405	1.24352
	1.05792	1.32208	1.11967	1.77642	1.08844	0.97734
	0.06445		0.88033	2.16393	1.85627	3.14261
	0.25322		1	0.4593
	0.30672		1	1.08354
			1	1.5708
			0.65399	0.91354
			1.34601	1.41359
			1.0622	1.35023
			0.9378	1.58937
			1.13504	0.94211
			0.86496	1.05072
mtROS (mitoSOX)	KO	CRL	TG
	0.5182	1.5324	2.4723
	0.1437	0.4826	2.5574
	0.2957	1.0497	0.9466
	0.8723	0.7257	1.1691
	0.8723	1.0248	1.6036
	0.3283	0.5562
		1.4438
Correlation (mtROS vs. ΔΨm): the average ± SEM are plotted for each magnitude
	KO	KO	CRL	CRL	TG	TG
	ΔΨm	mtROS	ΔΨm	mtROS	ΔΨm	mtROS
	0.81988	0.5182	0.77896	1.5324	1.36129	2.4723
	0.63866	0.1437	1.25226	0.4826	2.05491	2.5574
	0.3128	0.2957	1.6914	1.0497	1.57405	0.9466
	1.05792	0.8723	1.11967	0.7257	1.08844	1.1691
	0.06445	0.8723	0.88033	1.0248	1.85627	1.6036
	0.25322	0.3283	1	0.5562
	0.30672		1	1.4438
			1
			0.65399
			1.34601
			1.0622
			0.9378
			1.13504
			0.86496
Figure 2J
CAT	KO	CRL	TG		SOD1	KO	CRL	TG		SOD2	KO	CRL	TG
	0.4791	0.5448	2.1412			1.0314	1.1325	2.4079			1.1439	1.2806	1.832
	0.876	1.0428	1.2964			0.5853	1.0121	1.3415			1.1477	0.7573	1.615
	0.778	1.305	3.4566			0.8852	1.0317	1.3974			1.0286	1.1026	1.0286
	0.5957	0.7775	1.6107			1.026	0.9182	1.2907			1.0736	0.9961	1.3541
	0.8052	0.8721	1.4188			0.9296	0.9056	1.2948			1.0602	0.8634	1.3718
		1.4578	1.7652
PRDX3	KO	CRL	TG		PRDX6	KO	CRL	TG		NRF2	KO	CRL	TG
	1.155	1.4551	0.8389			1.3567	1.2566	0.328			0.4808	0.8411	0.8828
	0.5654	1.5302	0.8292			0.5593	1.6776	0.1833			1.3487	1.2766	0.9142
	0.99	0.6818	1.6067			0.8247	0.5176	0.4341			1.398	0.8667	0.5086
	0.9514	0.7338	0.4739			0.6437	0.692	1.599			1.3073	0.967	0.5047
	1.1016	0.599	1.1823			0.9745	0.8562	1.4551			1.0346	1.0487	0.9366
GCLC	KO	CRL	TG		GSR	KO	CRL	TG
	1.1047	1.1129	1.2691			1.5293	1.0112	1.0409
	1.3078	1.3363	1.0456			1.2465	1.3477	1.0662
	0.7231	0.8592	0.4301			0.7991	0.7185	1.9106
	1.027	0.7523	1.0619			1.256	0.8604	1.0594
	0.8296	0.9393	1.1888			0.9056	1.0621	1.2506

## Sheet: Figure 3
Figure 3B
ProbeID	KO1	KO2	KO3	CRL1	CRL2	CRL3	TG1	TG2	TG3
Actr3	14.63	14.63	14.9	14.33	14.83	14.93	13.38	13.53	13.99
Akap13	9.85	8.2	9.76	10.18	9.69	8.82	10.52	10.17	10.49
Atp2b2	14	13.05	14.03	14.1	14.33	13.57	15.08	14.86	14.85
Brinp3	9.59	10.28	9.65	9.25	8.89	10.2	8.1	9.08	9.21
Cabp5	10.52	9.83	9.86	10.9	10.79	9.67	12.08	10.57	11.98
Caprin1	9.89	10.05	9.86	8.92	9.28	10.09	9.04	8.93	8.5
Cav2	11.03	11.76	11.43	10.74	10.02	11.44	10.3	10.48	10.27
Dcaf12l2	9.83	9.15	9.38	10.2	10.01	8.96	11.05	9.93	11.23
Entpd4	14.1	14.14	14.23	14.08	13.68	14.17	13.35	12.9	13.08
Ephx4	14.1	14.48	14.51	14.1	13.54	14.29	12.54	13.63	13.91
Ermn	12.43	12.16	11.43	12.76	13.04	11.69	13.2	12.91	13.31
Gabra2	9.41	8.51	9.72	9.39	9.52	9.53	10.24	10.67	10.63
Hdac4	11.33	11.77	11.54	10.82	11.26	11.6	10.71	10.97	9.79
Hspa14	13.1	13.07	13.2	12.65	13.17	13.25	11.86	11.55	12.86
Ino80b	8.96	8.85	9.44	8.39	9.32	9.07	10.35	10.14	10.53
Klf10	11.08	11.86	11.82	10.45	10.62	11.45	10.08	10.75	10.87
Lrif1	9.71	9.87	9.96	9.37	9.48	9.81	8.2	8.85	9.13
Pisd-ps3	11.3	11.47	11.06	10.68	11.1	10.94	10.27	9.76	10.59
Pithd1	10.86	11.26	10.95	10.53	10.28	11.05	9.06	9.92	10.02
Plekha5	10.37	10.96	10.99	10.23	9.61	11.1	9.94	9.75	9.54
Pxdn	12.28	12.51	12.52	11.2	11.03	12.42	11.96	11.21	11.12
R3hdm2	13.04	13.67	13.31	12.84	12.67	13.3	11.82	12.29	12.68
Ralgapa1	12.21	12.35	12.27	11.12	11.55	12.4	11.74	10.52	11.48
Serpini1	9.41	9.97	9.27	8.74	9.12	9.75	7.71	8.47	9.34
Shc4	10.09	9.5	9.78	10.24	10.29	9.13	11.76	10.24	11.66
Slc25a37	8.08	8.18	8.18	7.88	8.31	8.07	7.84	6.72	6.78
Snca	16.33	16.48	16.61	15.91	15.36	16.38	14.91	15.06	15.13
Socs2	10.12	10.19	10.02	9.31	9.55	9.87	8.2	9.15	9.17
St6galnac1	8.38	7.85	7.75	8.82	8.7	7.74	9.91	8.56	9.72
Stk38l	6.75	6.96	6.9	6.69	6.6	6.86	7.58	8.04	8.1
Tmem126a	10.96	11.49	11.44	11.08	9.8	11.56	9.81	10.45	10.59
Tmem181a	10.78	12.08	12.19	11.86	12	11.76	10.9	9.8	11.07
Trnp1	15.93	16.15	16.24	14.75	14.71	16.15	14.74	15.23	15.14
Wdfy1	10.68	10.4	10.7	12.42	11.81	12.12	11.83	11.78	11.74
Figure 3H
	Camk1d	Camk2b	Mapk1	Map2k4	Snca	Ikbkap	Tia1	Gps2	Actg1	Dld
KO 1	8.2773	2.14489	1.51637	1.03619	1.57446	0.818557	1.97212	1.34987	4.44447	2.09311
KO 2	7.3223	1.58878	1.81066	1.18257	1.81595	1.26009	2.76252	1.34084	5.46957	2.56435
KO 3	3.09531	1.25481	1.19932	1.52028	1.52548	1.46527	2.18822	1.51089	5.44997	2.97643
KO 4	4.19538	2.10935	1.96426	1.40422	1.32683	1.30945	2.31606	1.54628	2.60116	3.60087
KO 5	4.15864	0.997768	1.3918	1.16759	1.49047	2.0457	1.28807	1.19261	2.96799	0.972238
KO 6	8.22564	0.722379	1.16604	1.43462	1.47603	1.54728	1.80279	1.84505	3.10716	1.98424
CRL 1	0.491448	1.06911	1.07623	1.29151	0.616447	0.731534	1.39897	1.0552	0.725192	1.03888
CRL 2	1.82977	1.54627	1.13316	1.50592	0.385901	0.932962	1.19941	1.36502	1.37651	1.88326
CRL 3	0.492364	1.02192	1.09699	0.974014	0.813136	1.11481	0.629732	0.831102	1.25102	0.743276
CRL 4	1.48146	0.670864	0.670992	0.638165	0.928983	1.09858	1.16261	1.27965	1.14335	0.870147
CRL 5	1.18756	0.910178	1.01968	0.602591	1.23118	1.12499	1.56998	1.00079	0.739838	0.652475
CRL 6	0.517395	0.781659	1.00296	0.987801	2.02436	0.997123	0.039293	0.468238	0.764084	0.811958
TG 1	1.4214	1.22117	1.27388	0.432892	0.463384	0.839079	1.34407	1.09519	1.98884	1.01083
TG 2	1.69432	1.52741	1.43164	0.986356	0.681185	0.578974	0.873817	1.09867	2.58442	1.37669
TG 3	0.404367	0.476917	0.86527	0.510903	0.477132	1.03619	1.73945	0.941126	2.82127	1.80157
TG 4	2.6211	1.12799	1.04443	0.841046	0.640477	0.935923	0.752788	1.47521	3.37181	1.47523
TG 5	1.16099	0.817541	1.03002	0.873921	0.787401	0.836181	2.10574	1.23661	3.28498	1.43777
TG 6	4.09231	0.873838	1.05915	1.04078	0.358495	1.38401	0.965067	0.954141	2.56599	1.48666

## Sheet: Figure 4
Figure 4C
Gene symbol	KO 1	KO 2	CRL 1	CRL 2	TG 1	TG 2
MAP2	2256	2145	2849	2596	2240	3297
ABAT	6961	7776	8036	8211	9734	9358
EFHD2	2430	2409	2470	2683	2633	2649
TAGLN3	6953	7074	6630	7760	7366	7570
RPL14	2308	2333	2300	2414	2722	2709
WASF1	1166	1087	1166	1116	997	966
RPL7	1301	1218	1256	1279	1448	1423
ATP5F1D	3717	4245	4022	3935	3462	3325
CKB	34790	34750	31200	37790	39510	40150
EZR	1742	1704	1923	1488	1518	1480
PCCB	730	729	705	729	684	700
PFKL	5126	5099	4976	5066	4406	4464
RAP2B	6989	7112	7040	6632	6000	5699
PPP3R1	5506	5062	5907	4298	4318	4376
PHB2	5621	5810	5604	5365	5382	5239
ATP6V1C1	9326	9096	8776	8672	8607	8258
TUFM	7384	7640	6690	6928	6995	5975
SUB1	1242	1211	1096	1114	794	727
MAP2K1	3330	3153	2692	2846	2819	2757
GAD2	915	697	739	851	1239	1125
ARFGAP1	785	855	803	851	723	741
Figure 4D
Up-regulated proteins
	KO	CRL	TG
MAP2	0.8083	1	1.0169
ABAT	0.9071	1	1.1751
EFHD2	0.9391	1	1.025
TAGLN3	0.9748	1	1.0379
RPL14	0.9845	1	1.1521
RPL7	0.9937	1	1.1325
CKB	1.008	1	1.1547
GAD2	1.0134	1	1.4867
Down-regulated proteins
	KO	CRL	TG
WASF1	0.9873	1	0.8601
ARFGAP1	0.9912	1	0.885
ATP5F1D	1.0006	1	0.853
EZR	1.0103	1	0.8789
PCCB	1.017	1	0.9652
PFKL	1.0182	1	0.8833
RAP2B	1.0314	1	0.8557
PPP3R1	1.0356	1	0.8519
PHB2	1.0421	1	0.9683
ATP6V1C1	1.0558	1	0.9666
TUFM	1.1032	1	0.9524
SUB1	1.11	1	0.6883
MAP2K1	1.1706	1	1.0069

## Sheet: Figure 5
Figure 5B
Glutamate (μmol g-1)	KO	CRL	TG		Glutamine (μmol g-1)	KO	CRL	TG		Aspartate (μmol g-1)	KO	CRL	TG		Alanine (μmol g-1)	KO	CRL	TG		GSH (μmol g-1)	KO	CRL	TG
	9.6976	9.9308	8.7604			5.4681	6.1721	5.2965			3.3286	3.421	2.8732			1.2133	1.1605	1.0263			2.3258	1.9764	1.9517
	9.2609	9.9594	8.7241			5.2184	5.9367	5.3636			2.8963	3.6355	2.9315			1.0087	1.2672	1.023			1.8832	2.1222	2.0868
	10.0287	8.5767	8.0751			6.4328	6.1391	4.895			3.3836	3.2076	2.5762			1.1264	1.1627	0.9526			2.3015	2.7992	2.3173
																					1.1658	3.0941	2.0797
Succinate (fold of CRL)	KO	CRL	TG		Asparagine (μmol g-1)	KO	CRL	TG		Glycine (μmol g-1)	KO	CRL	TG		5-Oxoproline (μmol g-1)	KO	CRL	TG
	1.174	0.751	0.759			0.1452	0.1507	0.1419			1.2166	1.5466	1.3068			0.171578	0.216491	0.157597
	1.333	1.147	0.389			0.1232	0.1518	0.1265			1.1319	1.5917	1.331			0.142824	0.196009	0.160545
	0.983	1.102	0.872			0.132	0.1551	0.1177			1.4014	1.5598	1.2067			0.158895	0.179597	0.136961
Figure 5C
Phenylalanine (μmol g-1)	KO	CRL	TG		Tyrosine (μmol g-1)	KO	CRL	TG		Dopamine (nmol g-1)	KO	CRL	TG
	0.1628	0.1815	0.1573			0.1661	0.1628	0.1397			0.014	0.043	0.006
	0.1606	0.1705	0.1496			0.1408	0.1727	0.1463			0.109	0.05	0.023
	0.1595	0.1727	0.1331			0.1364	0.154	0.1397			0.033	0.052	0.017
											0.036
DOPAC (nmol g-1)	KO	CRL	TG		3-Methoxytyramine (nmol g-1)	KO	CRL	TG		HVA (nmol g-1)	KO	CRL	TG
	0.043	0.102	0.042			0.022	0.074	0.021			0.145	0.261	0.101
	0.152	0.109	0.061			0.07	0.067	0.035			0.252	0.148	0.131
	0.051		0.042			0.116	0.06	0.032			0.068	0.154	0.084

## Sheet: Figure 6
Figure 6C
	Stimulation intensity (μA):	0	20	40	60	80	100	150	200	250
fEPSP slope (mV ms-1)	KO 1	0.00280235	0.0040594	0.0145402	0.0514591	0.0642539	0.0578965	0.0675046	0.0768644	0.0858079
	KO 2	0.000854471	-0.00527825	0.00601374	0.0139636	0.00930183	0.012882	0.0311179	0.0173814	0.0345574
	KO 3	-0.00741983	0.00772268	0.0169812	0.0439025	0.0469743	0.0553243	0.0552594	0.0423017	0.0288141
	KO 4	-0.011173	0.0010059	0.0120707	0.00657618	-0.00705209	-0.00474826	0.0105781	0.0642584	0.141842
	KO 5	-0.00130509	0.00626925	-0.000448376	0.0204331	0.0332359	0.0680971	0.118211	0.206741	0.261291
	KO 6	-0.000256215	0.00303454	0.0151247	0.00395532	0.0112254	0.0265342	0.0639016	0.100244	0.135722
	KO 7	0.00230593	0.00323471	-0.00413146	-0.0103607	0.000312262	-0.000904758	0.0240522	0.0690419	0.130405
	KO 8	-0.0113353	-0.000930183	0.00322319	0.00120059	0.0210805	0.0506625	0.121486	0.172235	0.245915
	CRL 1	0.00315464	0.00375515	0.00293846	0.00603706	-0.00137715	0.00385923	0.0171424	0.0222186	0.0438287
	CRL 2	0.0209536	-0.00604507	-0.00253813	0.00803073	-0.00284238	0.0066776	0.0148444	0.0251091	0.0350854
	CRL 3	-0.00149726	-0.00471595	0.00273029	0.0196164	0.0353817	0.0411785	0.0393049	0.0526922	0.0627166
	CRL 4	-0.00494014	-0.00933583	0.0116498	0.0296569	0.0558468	0.0578725	0.0761038	0.0581607	0.0662395
	CRL 5	-0.0064374	0.00116898	0.0267744	0.0305776	0.0399215	0.0692661	0.0570078	0.0626045	0.0735737
	CRL 6	-0.00364305	0.00542054	0.00242603	0.0169102	0.0297049	0.0378717	0.0731653	0.0757035	0.087113
	CRL 7	-0.00774249	-0.00406741	0.00367508	0.00992832	0.0199447	0.0350213	0.0650705	0.0860641	0.101765
	CRL 8	-0.0129709	-0.00351495	0.00375515	0.00959204	0.0140197	0.0254213	0.0275991	0.0458304	0.066784
	CRL 9	-0.00030285	0.0109675	0.00559192	0.0158131	0.0334866	0.0377914	0.0233952	0.0359851	0.0690932
	TG 1	-0.00366665	-0.000162241	0.0113893	0.00987508	0.0205181	0.0229626	0.0348278	0.0392407	0.0864638
	TG 2	-0.00301769	-0.00305014	0.00337462	0.0218485	0.0370234	0.0553351	0.0654589	0.113904	0.158412
	TG 3	5.6047e-05	-0.00320268	0.00436366	0.00351495	0.0178229	0.0449417	0.0908361	0.127163	0.174178
	TG 4	0.00983224	-0.00236999	0.0295368	0.0839984	0.114824	0.156627	0.218079	0.285391	0.347267
	TG 5	0.00211377	-0.000144121	0.00409143	0.019096	0.0521477	0.109916	0.181584	0.241002	0.384947
	TG 6	-0.0174867	0.00361103	0.003579	0.0523879	0.096665	0.176532	0.347347	0.421449	0.496856
	TG 7	-0.0136607	0.00536478	0.0163539	0.0507923	0.0968364	0.184696	0.295852	0.397805	0.477887
	TG 8	-0.00470795	-0.0156931	-0.0101125	-0.0221946	-0.0113215	0.0135474	0.111333	0.254549	0.365066
	TG 9	-0.00231394	0.00228191	0.00646142	0.0361423	0.0665358	0.0931981	0.143656	0.266391	0.433723
	TG 10	-0.00241199	0.00992917	0.0803635	0.149338	0.187616	0.207582	0.285458	0.374896	0.490196
	TG 11	-0.00482004	-0.0260378	-0.0157332	-0.0044117	0.0193042	0.0455822	0.0946633	0.142207	0.147243
Figure 6D
p-GluA1 (S831)/GluA1	KO	CRL	TG		p-GluA1 (S845)/GluA1	KO	CRL	TG
	0.3387	0.6052	1.5242			0.0897	0.4952	1.2437
	0.5211	0.6839	2.0201			0.2747	0.6894	2.3445
	1.02	1.3363	1.9266			0.972	1.2735	2.674
	0.8751	1.122	1.1562			1.059	1.0197	0.8765
	0.87	1.2526				0.7014	1.5223
GluA1	KO	CRL	TG		p-ERK 1/2/ERK 1/2	KO	CRL	TG
	0.965	1.1964	0.6712			0.4675	0.5466	2.6925
	1.229	1.3204	0.7395			0.4426	0.8234	2.3692
	0.743	0.4868	0.2808			1.1966	1.1394	2.1777
	1.1954	0.8527	0.9624			1.3785	1.5487	0.7053
	0.6608	1.1437	1.1182			1.0647	0.942	2.5335
Figure 6E
Spine density (spines μm-1)
KO	0.211787	0.344381	0.261026	0.264562	0.0390215	0.155664	0.2014	0.238528	0.377855	0.219038	0.16092	0.241127	0.191562	0.125248	0.0927305	0.341656	0.393358	0.373746	0.450007	0.233072	0.291303	0.316483	0.17442	0.273164	0.163617	0.165069	0.130111
CRL	0.208033	0.213623	0.111792	0.198777	0.125715	0.21749	0.293171	0.346815	0.427314	0.225365	0.484624	0.282763	0.283151	0.455048	0.237186	0.299909	0.205106	0.218427	0.212606	0.285847	0.276873	0.153132	0.225487	0.295907	0.222111	0.319541	0.190187	0.393804	0.183885	0.433279	0.18505	0.107867	0.149379	0.183104	0.152824	0.309286	0.142739
TG	0.142081	0.156468	0.0661677	0.0983861	0.0493784	0.135904	0.185068	0.290168	0.124392	0.15437	0.154186	0.280169	0.287018	0.0738755	0.191373	0.170449	0.121625	0.0969985	0.202786	0.116039	0.0797722	0.154059	0.15638	0.30685	0.0773746	0.05762	0.0963908	0.136306	0.135376	0.144711	0.100364	0.189846	0.1014	0.10032	0.110538	0.154878	0.205803	0.206628	0.131248	0.174927	0.110349	0.16866	0.224896	0.073608	0.142402	0.291028	0.237179	0.314213	0.102049
Spine area (μm2)
KO	0.3954	0.0952	0.3807	0.432	0.7102	0.2636	0.3295	0.1537	0.0805	0.0952	0.0366	0.0879	0.1904	0.1318	0.0732	0.0293	0.0366	0.6296	0.5491	0.1245	0.0805	0.1025	0.2709	0.2709	0.2123	0.1318	0.4027	0.1537	0.183	0.1171	0.0805	0.1757	0.1537	0.227	0.3221	0.1171	0.3734	0.1171	0.205	0.183	0.1611	0.4905	0.4979	0.3148	0.1391	0.1611	0.0366	0.0586	0.1391
CRL	0.3295	0.2709	0.2709	0.4173	0.615	0.6004	0.4539	0.1684	0.3587	0.7321	0.4832	0.3368	0.3734	0.3295	0.0732	0.0732	0.3807	0.1171	0.0293	0.183	0.3514	0.6296	0.6004	0.1098	0.5345	0.1977	0.0879	0.2196	0.1537	0.1391	0.2562	0.0952	0.7907	0.0512	0.6516	0.2709	0.593	0.0659	0.2929	0.2782	0.5564	0.0366	0.5784	0.4905	0.1611	0.0805	0.1757	0.183	0.1537
TG	0.6516	0.7102	0.6004	0.5711	0.7102	0.205	0.4539	0.2489	0.7541	1.0836	0.5491	0.4759	0.9884	0.3295	0.5418	0.3221	0.4246	0.82	0.2416	0.3441	0.5711	0.432	0.1904	0.1904	0.2709	0.5271	0.4173	0.3295	0.5711	0.1757	0.3002	0.1318	0.82	0.4466	0.2855	0.4686	0.1391	0.3295	0.5637	0.6223	0.3441	0.3954	0.3587	0.4466	0.1318	0.3734	0.1318	0.1025	0.1318
Figure 6F
RhoA	KO	CRL	TG		WAVE1	KO	CRL	TG		β-actin	KO	CRL	TG
	0.575	0.9556	1.1803			1.2776	1.0805	0.5167			0.8932	1.2145	1.103
	0.3645	0.9179	1.3488			1.2208	0.9931	0.6453			1.6808	1.1459	0.7169
	0.3312	1.2172	1.1182			0.753	1.0737	0.6873			0.9492	0.754	0.5833
	0.1985	0.7914	1.3048			0.6226	0.7678	0.1529			0.9663	0.6907	0.6908
	0.525	1.1178	0.8486			0.6504	1.0849	0.2084			0.892	1.1948	0.945
Figure 6H
Distance (m)	KO	CRL	TG		Line crossings	KO	CRL	TG		Time mobile (s)	KO	CRL	TG
	19.5	22.9	21.8			307	308	310			273.4	263.9	267.7
	26.5	22.2	23.5			349	306	291			272	278.1	274
	28.5	22.6	10			334	316	121			267.7	292.6	207.3
	33	18.9	21.7			412	277	292			285.2	283.4	280.3
	32.2	29.3	19.9			396	373	262			280.1	283.4	269.8
	20.9	23.1	18.7			293	307	217			269	247.3	249.7
	32.8	29.7				393	377				295.2	283.4
		29.6					349					276.8
		33.7					402					277.5
Figure 6J
Discrimination index (%) (2 h)	KO	KO	CRL	CRL	TG	TG
	Training	Test	Training	Test	Training	Test
	48	30	50	61	53	54
	43	36	38	59	47	68
	65	53	45	51	40	87
	40	57	40	49	59	49
	46	72	48	63	52	82
	61	68	46	66	36	54
	58	56	32	73	42	47
					54	68
Figure 6K
Discrimination index (%) (24 h)	KO	KO	CRL	CRL	TG	TG
	Training	Test	Training	Test	Training	Test
	50	51	45	46	32	67
	32	50	62	62	50	38
	59	49	53	69	48	60
	40	25	42	28	55	41
	51	57	38	55	53	62
	49	54			61	73
	54	60			31	44
					33	72
					48	76
[truncated: 543 more columns]

## Sheet: Figure 7
Figure 7A
MitoP/MitoB Ratio	-MQ	+MQ
	0.0912	0.017
	0.0163	0.0056
	0.0065	0.0105
	0.0102	0.0054
	0.0111	0.003
	0.0083	0.0066
	0.0073	0.0095
	0.0062	0.0074
	0.0108	0.0061
	0.0184	0.0059
	0.0313	0.0163
	0.0209	0.0143
	0.0641	0.0165
	0.0244	0.0145
	0.0256	0.0216
	0.0183
	0.0322
Figure 7B
NRF2	-MQ	+MQ		KEAP1	-MQ	+MQ		SOD2	-MQ	+MQ
	0.708967	0.625939			1.42708	0.715264			0.967601	0.901234
	0.826229	0.458271			0.719881	0.741205			0.884798	0.74991
	1.05692	0.794314			0.96356	0.611118			1.50003	0.861843
	1.08623	0.584506			0.826714	0.435568			0.947824	0.48026
	0.972599	0.488274			0.752329	0.428078			1.00016	0.626721
	1.34906	0.498941			1.31044	0.667643			0.699589	0.55649
PRDX3	-MQ	+MQ		CAT	-MQ	+MQ		SOD1	-MQ	+MQ
	0.739452	0.363453			1.10839	1.07423			0.822256	0.899236
	0.811675	0.179122			1.26846	0.928702			1.01974	1.11316
	1.26275	0.601328			0.834271	1.0522			1.36342	0.987813
	1.38941	0.252707			1.09666	1.20512			0.889804	0.703832
	0.963377	0.702229			0.942149	1.49105			1.02272	0.784104
	0.833331	0.528487			0.750077	0.770686			0.882062	0.635283
PRDX6	-MQ	+MQ		GSR	-MQ	+MQ		HMOX1	-MQ	+MQ
	0.540151	0.515957			0.924541	0.772353			0.76815	1.4149
	0.539255	0.791663			0.885323	0.72266			1.24771	1.71331
	0.794533	1.10551			1.54326	0.95828			1.5862	1.04647
	1.16179	0.584145			1.17873	0.72031			0.678031	1.30354
	1.07028	0.603012			0.806738	0.824516			0.797393	1.43344
	1.89399	0.678646			0.661416	0.874147			0.922509	0.337283
Figure 7C
	Stimulation intensity (μA):	0	20	40	60	80	100	150	200	250
fEPSP slope (mV ms-1)	- MQ 1	-0.00366665	-0.000162241	0.0113893	0.00987508	0.0205181	0.0229626	0.0348278	0.0392407	0.0864638
	- MQ 2	-0.00301769	-0.00305014	0.00337462	0.0218485	0.0370234	0.0553351	0.0654589	0.113904	0.158412
	- MQ 3	5.6047e-05	-0.00320268	0.00436366	0.00351495	0.0178229	0.0449417	0.0908361	0.127163	0.174178
	- MQ 4	0.00983224	-0.00236999	0.0295368	0.0839984	0.114824	0.156627	0.218079	0.285391	0.347267
	- MQ 5	0.00211377	-0.000144121	0.00409143	0.019096	0.0521477	0.109916	0.181584	0.241002	0.384947
	- MQ 6	-0.0174867	0.00361103	0.003579	0.0523879	0.096665	0.176532	0.347347	0.421449	0.496856
	- MQ 7	-0.0136607	0.00536478	0.0163539	0.0507923	0.0968364	0.184696	0.295852	0.397805	0.477887
	- MQ 8	-0.00470795	-0.0156931	-0.0101125	-0.0221946	-0.0113215	0.0135474	0.111333	0.254549	0.365066
	- MQ 9	-0.00231394	0.00228191	0.00646142	0.0361423	0.0665358	0.0931981	0.143656	0.266391	0.433723
	- MQ 10	-0.00241199	0.00992917	0.0803635	0.149338	0.187616	0.207582	0.285458	0.374896	0.490196
	- MQ 11	-0.00482004	-0.0260378	-0.0157332	-0.0044117	0.0193042	0.0455822	0.0946633	0.142207	0.147243
	+ MQ 1	-0.00699787	-0.0137395	-0.000904758	0.0168782	0.0392649	0.0482004	0.0744544	0.089443	0.0982744
	+ MQ 2	-0.0133254	-0.0161917	-0.023698	0.00575416	0.0660106	0.107847	0.184966	0.253799	0.293527
	+ MQ 3	0.00204171	-0.0127947	-0.0332999	-0.0122503	0.0336922	0.0618518	0.108843	0.137003	0.170959
	+ MQ 4	0.00307458	0.000824691	-0.00220985	0.00829495	0.0263021	0.0416669	0.0437327	0.0595219	0.0861602
	+ MQ 5	0.00127307	-0.00713398	-0.00612513	-0.0168701	-0.0145082	0.00486808	0.021466	0.0552863	0.0724928
	+ MQ 6	-0.00815083	0.00382721	0.0146923	0.00303454	0.00227391	0.0326193	0.0510988	0.0515552	0.0928859
	+ MQ 7	-0.00423555	0.000808678	0.00506024	0.0144922	0.0624764	0.148613	0.363377	0.456327	0.477624
	+ MQ 8	0.000128107	0.00365907	0.0134032	0.05483	0.0719723	0.0983705	0.13625	0.173481	0.190215
	+ MQ 9	0.00595699	0.0106329	0.014284	0.0237319	0.0176868	0.0321069	0.0721485	0.0800591	0.124641
	+ MQ 10	-0.00354295	0.00343541	-0.00442214	-0.00786918	0.00217401	0.0227283	0.0469128	0.0635565	0.0780509
	+ MQ 11	-0.0121222	-0.00068057	0.0339565	0.0377837	0.0117459	0.0282477	0.0495375	0.0752151	0.0968252
Figure 7D
p-GluA1 (S831)/GluA1	-MQ	+MQ		p-GluA1 (S845)/GluA1	-MQ	+MQ		GluA1	-MQ	+MQ
	0.604799	1.08172			1.18943	1.37622			1.03035	1.09327
	0.847649	1.53694			1.23137	1.50708			1.14484	0.802917
	1.24882	1.21528			1.25058	1.31718			0.373253	1.50365
	1.11622	0.982864			1.0084	0.6014			1.12064	0.683118
	1.09336	1.21042			0.617949	1.73925			1.27813	1.20417
	1.08915	1.22406			0.702274	1.05117			1.05278	0.644087
p-ERK 1/2/ERK 1/2	-MQ	+MQ		p-CaMKIIα/CaMKIIα	-MQ	+MQ
	1.23488	0.606325			1.58004	0.250562
	0.792817	0.574616			0.86563	0.328186
	0.762182	0.190946			1.00754	0.38642
	1.38451	0.264873			0.510707	0.731884
	0.663353	0.827153			1.02802	0.651395
	1.16225	0.692437			1.00806	0.582498
Figure 7E
Discrimination index (%)	-MQ	-MQ	+MQ	+MQ
	Training	Test	Training	Test
	54.7	68.4	46.7	57.8
	66.4	92.7	51.5	25.9
	44.6	65.9	44.3	76.2
	55.8	84.6	37	77.7
	48	60	40	86.8
	55	41	48.3	60.1
	53	62	47.6	29.1
	31	44	41.1	38
	33	72	35.7	6.4

## Sheet: Figure S1
Figure S1B
IF1 protein	+/+	+/-	-/-
	1.07	1.15	0.58
	0.93	1.08	0.37
	1.4	0.84	0.56
	1	0.97	0.19
	0.71	0.8	0.05
	1.29	0.78	0.22
			0.26
			0
Figure S1C
NADHs9	KO	CRL	TG		SDH-B	KO	CRL	TG		UQCRC2	KO	CRL	TG		COX IV	KO	CRL	TG
	1.0256	0.5013	2.2164			1.9793	1.0912	1.5439			1.7529	0.8753	1.3677			0.5634	1.1265	0.4262
	0.6987	1.006	0.8935			1.4473	1.5657	1.8408			1.785	1.1425	1.5395			1.2005	1.6402	2.3521
	1.1465	0.8154	1.1224			1.1222	0.7734	1.625			0.8561	0.5445	1.3132			2.0518	1.2013	2.2375
	1.0329	1.5727	1.0304			0.5546	0.7349	0.5554			0.8858	0.6856	1.52			0.8628	0.5637	1.613
	1.9368	1.1046	2.2819			0.5154	0.8348	1.9071			0.5756	1.752	1.7068			0.9678	0.4682	0.6512
β-F1	KO	CRL	TG		IF1	KO	CRL	TG		MPC1	KO	CRL	TG
	1.3591	0.9442	1.1991			0	0.6473	1.9324			1.2561	0.8076	1.1573
	1.1203	1.4623	0.9009			0	1.1272	2.4015			0.9772	0.7574	1.3473
	0.5473	0.2857	0.4023			0.3303	1.2252	1.6907			1.0273	1.2714	2.0786
	1.1508	1.0229	0.8268			0.1691	0.9886	1.3722			1.1646	1.1378	1.071
	0.8492	1.285	1.9478			0.1492	1.0116	3.663			0.9238	1.0258	1.1203
Figure S1D
FoF1 monomers	KO	CRL	TG		FoF1 di- and oligomers	KO	CRL	TG
	1.471	0.948	1.444			0.333	0.818	2.094
	0.878	0.689	1.356			0.572	1.159	1.597
	1.342	1.362	1.579			0.535	1.023	1.165
Figure S1E
H2O2 production rate (RFU s-1)	KO	KO	KO	CRL	CRL	CRL	TG	TG	TG
	Basal	FCCP	Rot	Basal	FCCP	Rot	Basal	FCCP	Rot
	85.1038	26.53	47.486	103.165	15.2896	47.1542	95.2607	20.524	59.913
	122.78	15.6064	32.6431	103.165	14.5725	35.3665	133.14	19.3049	50.7845
	79.5361	29.073	46.4427	102.677	14.826	37.5052	121.957	26.358	47.7766
	120.115			103.165		51.3501	80.7271

## Sheet: Figure S2
Figure S2A
										TBS
	Time (min):	-18.875	-16.375	-13.875	-11.375	-8.875	-6.375	-3.875	-1.375	1.685	4.745	7.245	9.745	12.245	14.745	17.245	19.745	22.245	24.745	27.245	29.745	32.245	34.745	37.245	39.745	42.245	44.745	47.245	49.745	52.245	54.745	57.245	59.745
Normalized fEPSP slope	KO 1	0.934159	0.887079	0.986776	1.08032	1.10939	0.907536	1.05424	1.04049	1.48039	1.41769	1.35477	1.48758	1.31596	1.59813	1.52342	1.72866	1.64741	1.64115	1.67637	1.84187	1.65309	1.93366	1.83379	1.69657	1.53428	1.63179	1.57827	1.42071	1.58406	1.5371	1.40848	1.4208
	KO 2	0.920095	0.98991	0.987538	0.980271	1.02004	0.985385	0.990858	1.1259	1.86108	1.76686	1.672	1.72323	1.68183	1.57048	1.6407	1.68295	1.56371	1.54974	1.61072	1.49193	1.65417	1.61411	1.48902	1.54618	1.61029	1.56213	1.51008	1.61891	1.55957	1.62856	1.45644	1.38238
	KO 3	1.02317	1.02867	0.99388	1.02696	1.03548	0.953433	0.9273	1.0111	2.29167	1.78213	1.6609	1.53447	1.37626	1.4063	1.39714	1.42991	1.46161	1.3861	1.36806	1.28343	1.37592	1.48576	1.46221	1.3256	1.38757	1.3688	1.2985	1.35653	1.42907	1.49793	1.42892	1.36209
	KO 4	0.922922	0.895809	0.989666	0.920634	1.04235	1.1029	1.07273	1.053	2.20019	1.64827	1.60816	1.64984	1.46425	1.51389	1.61265	1.63415	1.38992	1.42282	1.38267	1.4474	1.50109	1.50135	1.63085	1.52334	1.43436	1.45323	1.49515	1.42092	1.3964	1.49207	1.59451	1.4161
	KO 5	1.1739	1.13078	1.16965	1.05602	0.802874	0.936555	0.775897	0.954317	3.40885	2.46042	2.37184	1.92324	1.65412	1.52577	1.62731	1.48195	1.54462	1.45372	1.42959	1.41898	1.55277	1.67933	1.51979	1.35305	1.57042	1.40203	1.67104	1.62264	1.62563	1.43562	1.47542	1.35891
	KO 6	0.982944	0.917408	0.946238	1.03695	0.993034	0.984923	1.08032	1.05818	1.47056	1.45633	1.66196	1.56938	1.55269	1.48353	1.55866	1.52494	1.45601	1.62426	1.53802	1.41006	1.49117	1.42575	1.48309	1.4999	1.43591	1.40811	1.44798	1.44141	1.35058	1.38589	1.39538	1.35113
	CRL 1	1.07016	1.09387	1.08215	0.893032	1.06543	1.19456	0.881959	0.718843	2.58066	1.5848	1.7802	1.74143	1.62892	1.68536	1.5441	1.50882	1.713	1.79996	1.58148	1.8866	1.58879	1.51384	1.83375	1.7328	1.68175	1.69299	1.58776	1.67533	1.5601	1.75183	1.65475	1.58498
	CRL 2	0.879164	0.902101	0.966935	1.00992	1.02263	1.16619	0.936476	1.11658	2.76374	2.08678	1.65471	1.34848	1.75687	1.54627	1.21778	1.63056	1.91286	1.36075	1.48747	1.43454	1.63199	1.55186	1.5288	1.41278	1.43469	1.09825	1.47354	1.10363	1.05632	1.56007	1.42437	0.836367
	CRL 3	1.10732	0.99051	0.992185	0.953005	0.914592	0.981771	1.04262	1.018	2.06031	1.69931	1.47252	1.30519	1.34746	1.60366	1.54339	1.54339	1.39447	1.63264	1.63231	1.57301	1.59243	1.68872	1.69209	1.76054	1.89422	1.86817	1.96804	1.86156	1.85085	1.87431	1.88719	1.65597
	CRL 4	0.987936	1.00312	1.01578	1.05564	1.11031	0.883419	1.04582	0.897983	1.78219	1.34441	1.23127	1.31788	1.19377	1.23611	1.17132	1.39012	1.23261	1.23449	1.28224	1.09442	1.1877	1.17539	0.917806	0.884879	1.12832	1.0693	1.05363	0.979845	0.918404	0.828134	0.999668	0.926759
	CRL 5	0.903723	0.823657	0.711348	0.994698	1.18391	1.21306	1.13326	1.03634	2.77984	2.37903	2.42325	2.48717	2.47789	2.20495	2.26753	2.30449	2.28238	2.11019	2.07128	2.11232	2.10643	2.08417	1.97758	1.8512	1.89476	1.95919	2.14838	1.93345	1.89499	1.85651	2.09986	2.03881
	CRL 6	1.05994	1.19897	0.971638	0.617745	1.10897	0.692444	1.12301	1.22729	2.2388	2.08124	1.80315	1.13168	0.94194	1.24535	1.25635	1.2857	1.29607	0.992304	1.24397	1.05225	1.39439	1.22445	1.44354	1.43123	1.52387	1.12328			1.11875	1.10794	1.26077	1.07039
	CRL 7	0.70452	0.801504	0.900691	1.01721	1.14625	1.03329	1.24438	1.15215	2.32384	2.10325	2.37649	2.3341	2.27635	2.28617	2.27636	2.17898	1.99674	2.16386	2.10558	2.11676	2.34445	2.19248	2.16611	2.20468	2.03792	2.01859	2.05381	2.10337	1.99002	2.02255	2.11148	2.22784
	TG 1	1.05879	1.01927	1.10367	0.949789	0.906963	1.10125	0.902523	0.957748	2.25122	1.81993	1.8724	1.96315	2.01517	1.9656	1.873	1.94356	1.86213	1.73654	1.75346	1.83059	1.66376	1.78268	1.74114	1.75465	1.73553	1.71975	1.67792	1.47168	1.55859	1.58215	1.44869	1.34328
	TG 2	0.983162	0.969452	1.00712	0.96293	1.00674	1.00073	1.02132	1.04854	2.11617	1.64643	1.56164	1.4773	1.47745	1.37267	1.34719	1.35085	1.30892	1.37533	1.3565	1.28984	1.34531	1.41591	1.34003	1.3364	1.34594	1.27261	1.29212	1.18733	1.23125	1.13012	1.14231	1.16404
	TG 3	1.04643	1.19702	0.971918	0.984517	0.955174	0.909368	0.991317	0.944264	3.74018	3.1035	3.39431	4.12176	2.94943	2.17742	1.44733	0.869826	1.12123	1.29	1.32835	1.54677	1.47302	1.63972	1.83089	1.79584	1.7162	1.60922	1.60486	1.76076	2.02383	1.88138	2.02931	1.89236
Normalized fEPSP slope	KO	CRL	TG
	1.48459	1.61177	1.4649
	1.48908	1.21278	1.1651
	1.40515	1.89617	1.92851
	1.527	0.909456
	1.40139	2.09811
	1.40437	1.17304
		2.08459
Figure S2B
GluN2A	KO	CRL	TG		GluN2B	KO	CRL	TG		GluN1	KO	CRL	TG
	1.1096	1.0326	0.2032			0.6726	0.9006	0.5736			0.9607	0.9483	0.3891
	1.7699	1.2634	0.4007			1.454	1.0534	0.6698			1.4805	1.1988	0.5798
	0.7948	0.6028	0.1751			1.6306	0.7475	0.2427			0.8973	0.5312	0.1851
	1.1957	0.914	0.1017			0.9479	1.0633	0.4363			1.1166	1.1329	0.1865
	0.882	1.1871	0.3022			0.8904	1.2351	0.3976			1.1189	1.1888	0.3919
p-CaMKIIα/CaMKIIα	KO	CRL	TG		PSD-95	KO	CRL	TG
	1.19	1.2725	1.1209			1.1239	1.1468	1.368
	0.878	1.0494	0.7597			1.4465	1.0104	0.7871
	1.0212	1.214	1.0461			0.9598	0.7658	0.6919
	1.2517	0.8087	1.0741			1.2007	0.7816	0.734
	0.692	0.6555	1.2757			0.7806	1.2955	0.837
Figure S2C
	Grin1	Grin2b
KO 1	1.28	2.097
KO 2	1.608	1.776
KO 3	1.764	2.281
KO 4	1.783	2.105
KO 5	1.44	1.713
KO 6	1.662	1.176
CRL 1	1.152	1.081
CRL 2	1.535	1.293
CRL 3	1.213	1.095
CRL 4	0.641	0.868
CRL 5	0.934	1.015
CRL 6	0.525	0.648
TG 1	1.494	1.477
TG 2	1.287	1.394
TG 3	0.951	1.288
TG 4	1.489	1.399
TG 5	2.003	2.702
TG 6	1.205	1.085
Figure S2D
Exploration time (s) (2 h)	KO	KO	CRL	CRL	TG	TG
	Training	Test	Training	Test	Training	Test
	177.9	169.3	64.8	100.2	205.4	145.2
	99.1	138.7	58	105.6	44.4	31.8
	86.9	172.6	90.2	102.6	40.2	105.1
	102.8	219.9	75.8	56	85	26.2
	81	112.2	147.7	147.5	126.8	139
	101.5	114.2	148.5	147.8	67.2	109.5
	189	88.6	112.6	64.6	98.2	72
					75.5	185.4
Exploration time (s) (24 h)	KO	KO	CRL	CRL	TG	TG
	Training	Test	Training	Test	Training	Test
	154.5	190.5	99.2	136.9	69.4	129.5
	132.1	148.3	92.4	67.4	56.9	71.8
	76.1	127.6	69.3	73.6	138.8	95.3
	117.7	180.3	127.8	169.1	67.4	62.8
	203	124.6	119.6	48.9	23.1	18.6
	169.3	106.2			129.3	150.4
	122	132.6			115.6	99.7
					40.1	80.4
					103	117.5
Figure S2F
Discrimination index (%)	TG	TG
	Training	Test
	59	70
	47	67
	52	62
	44	54
	34	40
	33	36
	55	74
Figure S2G
Discrimination index (%)	TG	TG
	Training	Test
	48	72
	57	66
	63	74
	60	73
	53	20
	50	57
	52	44
	55	30

## Sheet: Figure S3
Figure S3A
Oxyblot
p50	-MQ	+MQ		p60	-MQ	+MQ		p100	-MQ	+MQ
	0.931291	0.757353			0.827457	0.806043			0.928747	1.01418
	0.956551	0.619649			0.952441	0.743288			1.18313	0.926249
	0.845233	0.616274			1.09902	0.63413			0.832392	0.488405
	0.836004	0.800819			1.28968	0.903597			0.817129	0.532825
	1.75696	0.434114			1.3315	0.302816			1.67288	0.386136
	0.673963	0.52171			0.499897	0.349151			0.565718	0.643826
Figure S3B
Nitro-Tyrosine
p40-50	-MQ	+MQ
	0.912377	0.940988
	1.12771	0.837862
	0.977629	0.840203
	0.950943	0.62339
	1.01741	1.00804
	1.01393	0.488131
Figure S3C
										TBS
	Time (min):	-18.875	-16.375	-13.875	-11.375	-8.875	-6.375	-3.875	-1.375	1.685	4.745	7.245	9.745	12.245	14.745	17.245	19.745	22.245	24.745	27.245	29.745	32.245	34.745	37.245	39.745	42.245	44.745	47.245	49.745	52.245	54.745	57.245	59.745
Normalized fEPSP slope	-MQ 1	1.05879	1.01927	1.10367	0.949789	0.906963	1.10125	0.902523	0.957748	2.25122	1.81993	1.8724	1.96315	2.01517	1.9656	1.873	1.94356	1.86213	1.73654	1.75346	1.83059	1.66376	1.78268	1.74114	1.75465	1.73553	1.71975	1.67792	1.47168	1.55859	1.58215	1.44869	1.34328
	-MQ 2	0.983162	0.969452	1.00712	0.96293	1.00674	1.00073	1.02132	1.04854	2.11617	1.64643	1.56164	1.4773	1.47745	1.37267	1.34719	1.35085	1.30892	1.37533	1.3565	1.28984	1.34531	1.41591	1.34003	1.3364	1.34594	1.27261	1.29212	1.18733	1.23125	1.13012	1.14231	1.16404
	-MQ 3	1.04643	1.19702	0.971918	0.984517	0.955174	0.909368	0.991317	0.944264	3.74018	3.1035	3.39431	4.12176	2.94943	2.17742	1.44733	0.869826	1.12123	1.29	1.32835	1.54677	1.47302	1.63972	1.83089	1.79584	1.7162	1.60922	1.60486	1.76076	2.02383	1.88138	2.02931	1.89236
	+MQ 1	1.11	1.02	0.96	1.02	0.99	0.99	0.94	0.97	1.75	1.58	1.71	1.72	1.67	1.66	1.72	1.69	1.69	1.68	1.72	1.65	1.61	1.63	1.69	1.7	1.83	1.75	1.7	1.69	1.67	1.63	1.72	1.71
	+MQ 2	1.06	1.06	0.97	0.95	0.99	0.92	1.14	0.92	1.58	1.5	1.33	1.45	1.28	1.26	1.26	1.32	1.12	1.1	1.27	1.21	1.03	1.12	1.19	1.12	1.01	1.01	1.15	1.16	0.97	1.13	1.12	0.94
	+MQ 3	1.13	0.96	1.03	1.07	0.65	1	1.23	0.93	3.28	2.38	2.12	2.38	2.23	2.29	2.2	2.18	2.26	2.25	2.04	1.99	2.16	1.92	1.85	1.84	1.95	1.74	1.86	1.72	1.84	1.68	1.6	1.54
	+MQ 4	0.95	0.95	0.92	0.98	0.95	0.93	1.09	1.22	2.03	2.04	1.98	2.1	1.95	1.92	1.91	1.81	1.89	1.89	1.8	1.81	1.71	1.67	1.65	1.62	1.67	1.71	1.71	1.75	1.63	1.59	1.63	1.66
Normalized fEPSP slope	-MQ	+MQ
	1.4649	1.69739
	1.1651	1.05143
	1.92851	1.64936
		1.59736
Figure S3D
GluN2A	-MQ	+MQ		GluN2B	-MQ	+MQ		GluN1	-MQ	+MQ		PSD-95	-MQ	+MQ
	0.702059	0.854628			0.717926	0.893169			0.724702	0.857864			1.02259	0.900221
	1.13934	0.54682			0.956885	0.70398			1.00153	0.980953			0.92858	0.929658
	0.44188	1.56747			0.7637	1.16757			1.43818	1.60227			1.09139	0.935769
	1.16082	0.892762			1.03825	0.977012			0.951073	0.802644			0.957445	1.00535
	1.26844	1.64059			1.3151	1.03128			1.16694	0.77842
	1.28746	1.50003			1.20814	0.785916			0.717577	1.05823
RhoA	-MQ	+MQ		WAVE1	-MQ	+MQ		β-actin	-MQ	+MQ
	0.596562	0.422791			0.404568	1.4327			1.0039	1.18878
	0.727639	0.439911			1.05767	1.35362			1.04882	1.01943
	1.68411	0.62464			1.11138	1.27983			0.803116	0.688704
	1.16456	0.70135			1.42638	0.8363			1.14416	0.898376
	0.713731
	1.11339
Figure S3E
Exploration time (s)	-MQ	-MQ	+MQ	+MQ
	Training	Test	Training	Test
	76	46	171	121
	89	81	89	177
	94	76	162	15
	52	55	99	24
	69.4	129.5	192	134
	67.4	62.8	86	109
	129.3	150.4	121	90
	115.6	99.7	102	23
	103	117.5	120	104
Figure S3G
Distance (m)	-MQ	+MQ		Line crossings (#)	-MQ	+MQ		Time mobile (s)	-MQ	+MQ
	18.515	17.328			252	243			241.6	238.2
	15.157	12.884			222	201			239.7	226.8
	9.056	9.019			120	132			130	172.3
	12.207	15.925			195	266			216.8	212.3
	13.061	16.345			200	221			196.5	250.3
	19.776	15.967			306	245			225.8	233.7
	11.652	14.712			192	243			112	191
	22.9	14.021			373	179			132.7	241.5
	23.1	10.896			307	191			250.3	203.8

[truncated: 1 more sheets: Figure S4]
