# Supplementary material for: Generation of mitochondrial reactive oxygen species is controlled by ATPase inhibitory factor 1 and regulates cognition
Source: PLoS Biol. 2021 May 13;19(5):e3001252. doi: 10.1371/journal.pbio.3001252 (PMC8148373; doi:10.1371/journal.pbio.3001252)
Supplement: S1 Table — The table summarizes the levels of other metabolites determined in hippocampal extracts. The results shown are the mean values ± SEM. Values are expressed as nmol per g, except for 3-hydroxyisobutyrate, 2-methyl-3-hydroxybutyrate, malate, and citrate, which are expressed as fold change of control. *P < 0.05 with respect to control, †P < 0.05 with respect to IF1KO by 2-tailed t test. IF1KO, IF1 knockout. (DOCX) [file pbio.3001252.s007.docx]

**S1 Table. Hippocampal metabolites.**

|  | ***IF1KO*** | **Control** | ***IF1TG*** |
| --- | --- | --- | --- |
| **Amino acids:** | | | |
| Valine | 168  7 | 180  3 | 152  3 * |
| Leucine | 237  8 | 248  5 | 214  3 * † |
| Isoleucine | 97  2 | 101  3 | 89  2 * † |
| Tryptophan | 46  1 | 51  2 | 40  3 * |
| Lysine | 333  7 | 336  12 | 319  12 |
| Arginine | 315  11 | 342  44 | 322  20 |
| Histidine | 89  9 * | 139  8 | 99  2 * |
| Cysteine | 22  3 | 25  5 | 23  3 |
| Methionine | 115  6 | 123  5 | 105  4 * |
| Serine | 1,037  4 * | 1,305  79 | 989  17 * |
| Threonine | 380  13 * | 424  5 | 357  6 * |
| Proline | 130  3 * | 161  3 | 146  6 |
| 4-Hydroxyproline | 2.6  1.0 | 2.6  0.4 | 2.9  1.0 |
| Taurine | 12,448  66 | 12,954  1039 | 12,022  441 |
| Citrulline | 34  7 | 48  4 | 39  7 |
| Ornithine | 40  7 * | 62  3 | 44  1 * |
| Cystathionine | 17  2 | 19  1 | 19  2 |
| β-Alanine | 910  48 | 976  29 | 811  24 * |
| Anserine | 19  4 * | 34  3 | 36  4 † |
| Sarcosine | 158  5 | 175  11 | 146  3 |
| Phosphoethanolamine | 1,196  91 | 1,273  113 | 1,171  70 |
| α-Aminobutyric acid | 3.7  0.4 | 2.6  0.4 | 3.7  1.3 |
| γ-Aminobutyric acid | 3,143  127 | 3,294  164 | 3,155  146 |
| **Neurotransmitters:** | | | |
| Serotonin | 3.3  0.1 | 3.2  0.1 | 3.0  0.2 |
| 5-Hydroxyindoleacetic acid | 1.8  0.0 | 1.8  0.0 | 1.7  0.1 |
| **Organic acids:** | | | |
| Lactate | 983  122 | 884  57 | 1,283  247 |
| Fumarate | 40  7 | 44  7 | 31  3 |
| Glutarate | 8.6  0.3 | 8.9  1.0 | 9.2  1.3 |
| 2-Hydroxyglutarate | 41  3 | 36  3 | 40  4 |
| 3-Hydroxy-3-methylglutarate | 4.0  0.2 | 3.9  0.3 | 3.1  1.5 |
| Glycerate | 15  1 | 16  3 | 18  1 |
| Glycolate | 257  27 | 181  55 | 196  62 |
| Ethylmalonate | 5.5  0.4 | 5.2  0.4 | 5.7  0.5 |
| Adipate | 3.7  0.2 | 4.1  0.3 | 4.1  0.4 |
| N-acetylaspartate | 51  14 | 32  7 | 75  15 |
| Suberic acid | 2.8  0.1 | 3.4  0.2 | 3.6  0.6 |
| 3-Hydroxyisobutyrate | 1.5  0.2 | 1.0  0.5 | 1.3  0.2 |
| 2-Methyl-3-hydroxybutyrate | 1.0  0.0 | 1.0  0.2 | 0.7  0.4 |
| Citrate | 0.7  0.1 | 1.0  0.2 | 0.6  0.1 |
| Malate | 1.3  0.1 | 1.0  0.2 | 1.1  0.1 |
